# Supplementary material
Source: MDPI journal article supplement (https://www.mdpi.com/2073-4395/12/1/154)
Supplement: s1 [file s1]

## Supplementary Material 1.

### ANALYSIS OF THE ACCEPTANCE OF SUSTAINABLE PRACTICES IN WATER MANAGEMENT FOR THE INTENSIVE AGRICULTURE OF THE COSTA DE HERMOSILLO (MEXICO)

#### PHASE 2. Semi-structured expert interviews.

##### Open-ended question blocks:

1. Contextualisation of the case study.
2. Current situation of the agricultural production model in the study area.
3. Regulation applicable to the case study (land ownership, development of agricultural activity, and irrigation water use).
4. Main obstacles to sustainability in the agricultural production model. Analysis of threats and opportunities.
5. Analysis of the agricultural production model in the case study (strengths and weaknesses, main actors).
6. Possible practices to be implemented to improve the situation and overcome the obstacles of the agricultural production model in terms of sustainability.
7. Main drivers for the adoption of the proposed sustainable practices (barriers and facilitators).
8. Possible measures to achieve the widespread adoption of practices capable of improving the sustainability of the agricultural production model in the study area.

##### Breakdown of possible questions to address each block of questions:

1. Contextualisation of the case study.
  - a. What was the situation of the agricultural production model prior to NAFTA?
  - b. What have been the main impacts on the study area following NAFTA?
    - i. Economics.
    - ii. Environmental.
    - iii. Social.
2. Current situation of the agricultural production model in the study area.
  - a. Main stakeholders involved.
  - b. Land tenure structure.
  - c. Workforce.
  - d. Financial capacity.
  - e. Main crops.
  - f. Future projection.
  - g. Income distribution.
3. Regulation applicable to the case study (land ownership, development of agricultural activity, and irrigation water use).
  - a. Regarding ownership of land and exploitation of the means of production.
  - b. In terms of water resources.
  - c. Regarding agricultural management and the natural environment.
4. Main obstacles to sustainability in the agricultural production model. Analysis of threats and opportunities.
  - a. What are the main external challenges facing the agricultural model?
  - b. What about internal challenges?

- c. What are the main external opportunities for the model?
  - d. What about internal opportunities?
- 5. Analysis of the agricultural production model in the case study (strengths and weaknesses, main actors).
  - a. What are the main strengths of the model in meeting the challenges?
  - b. What are the main weaknesses of the model to ensure its sustainability?
- 6. Possible practices to be implemented to improve the situation and overcome the obstacles of the agricultural production model in terms of sustainability.
  - a. On land management.
  - b. Regarding the use of inputs.
  - c. Regarding water use.
  - d. Regarding the use of machinery.
  - e. In terms of manpower.
  - f. Regarding varieties and crops.
  - g. Regarding the handling and transport of goods.
  - h. With regard to marketing.
- 7. Main drivers for the adoption of the proposed sustainable practices (barriers and facilitators).
  - a. In terms of stakeholders.
  - b. In the legal field.
  - c. In terms of financing.
  - d. Regarding the level of environmental awareness.
  - e. In terms of technical expertise.
  - f. In terms of technology availability.
- 8. Possible measures to achieve the widespread adoption of practices capable of improving the sustainability of the agricultural production model in the study area.
  - a. In terms of stakeholders.
  - b. In the legal field.
  - c. In terms of financing.
  - d. Regarding the level of environmental awareness.
  - e. In terms of technical expertise.
  - f. In terms of technology availability.
